# Supplementary material for: One-Pot Solvent-Involved Synthesis of 5-O-Substituted 5H-Chromeno[2,3-b]pyridines
Source: MDPI journal article supplement (doi:10.3390/molecules28010064), 2022-12-21

## Supplementary Material:

### ***One-pot solvent-participated synthesis of 5-O-substituted 5H-chromeno[2,3-b]pyridines***

Yuliya E. Ryzhkova, Fedor V. Ryzhkov, Michail N. Elinson\*, Oleg I. Maslov, Artem N. Fakhrutdinov

*N. D. Zelinsky Institute of Organic Chemistry, Russian Academy of Sciences, 47 Leninsky Pr., Moscow  
119991, Russian Federation. E-mail: elinson@ioc.ac.ru*

#### **Table of Contents**

|                                                                                                     |     |
|-----------------------------------------------------------------------------------------------------|-----|
| 1. The copies of <sup>1</sup> H NMR and <sup>13</sup> C NMR spectra for compounds <b>4a-i</b> ..... | S2  |
| 2. Detailed 1D <sup>1</sup> H and <sup>13</sup> C NMR spectra for compound <b>4d</b> .....          | S11 |
| 3. 2D NMR data for compound <b>4d</b> .....                                                         | S12 |

## 1. The copies of $^1\text{H}$ NMR and $^{13}\text{C}$ NMR spectra for compounds 4a-i

**Figure S1.**  $^1\text{H}$  NMR spectrum of 2,4-diamino-5-methoxy-5*H*-chromeno[2,3-*b*]pyridine-3-carbonitrile **4a** in  $\text{DMSO-}d_6$ .

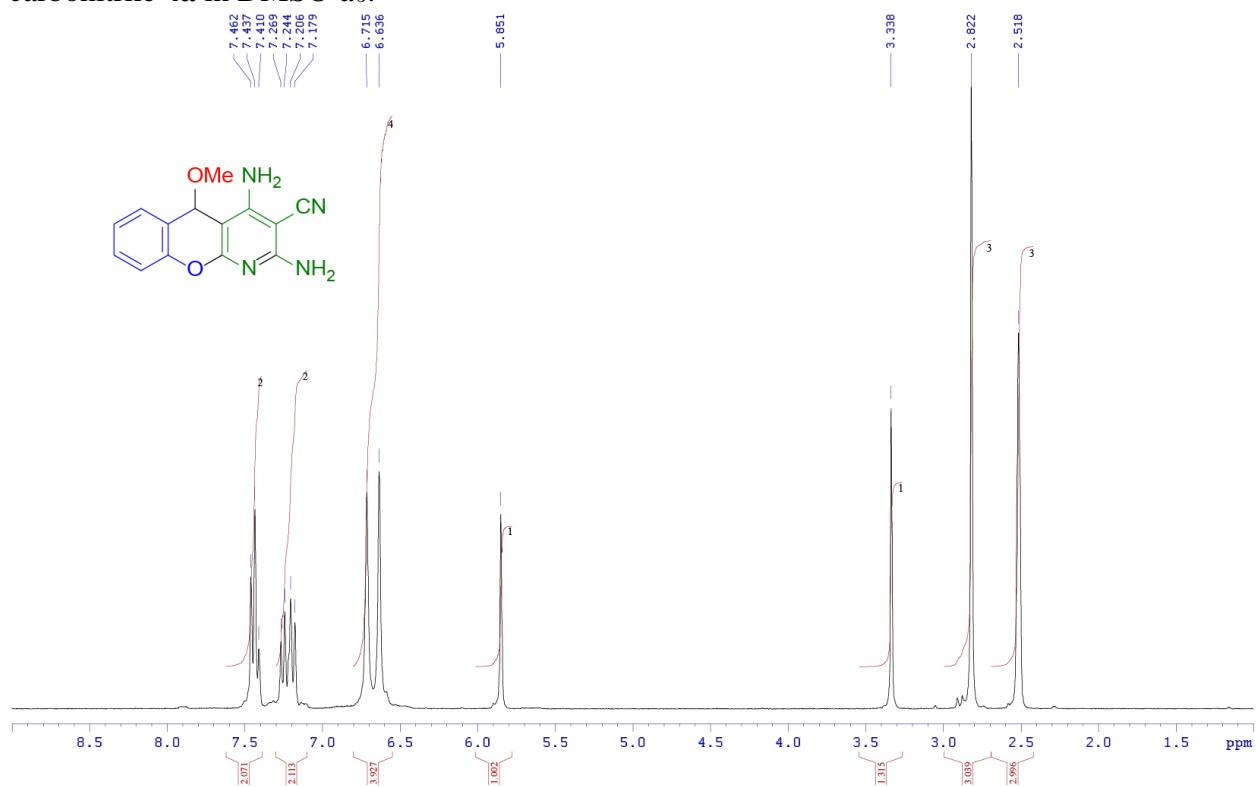

**Figure S2.**  $^{13}\text{C}$  NMR spectrum of 2,4-diamino-5-methoxy-5*H*-chromeno[2,3-*b*]pyridine-3-carbonitrile **4a** in  $\text{DMSO-}d_6$ .

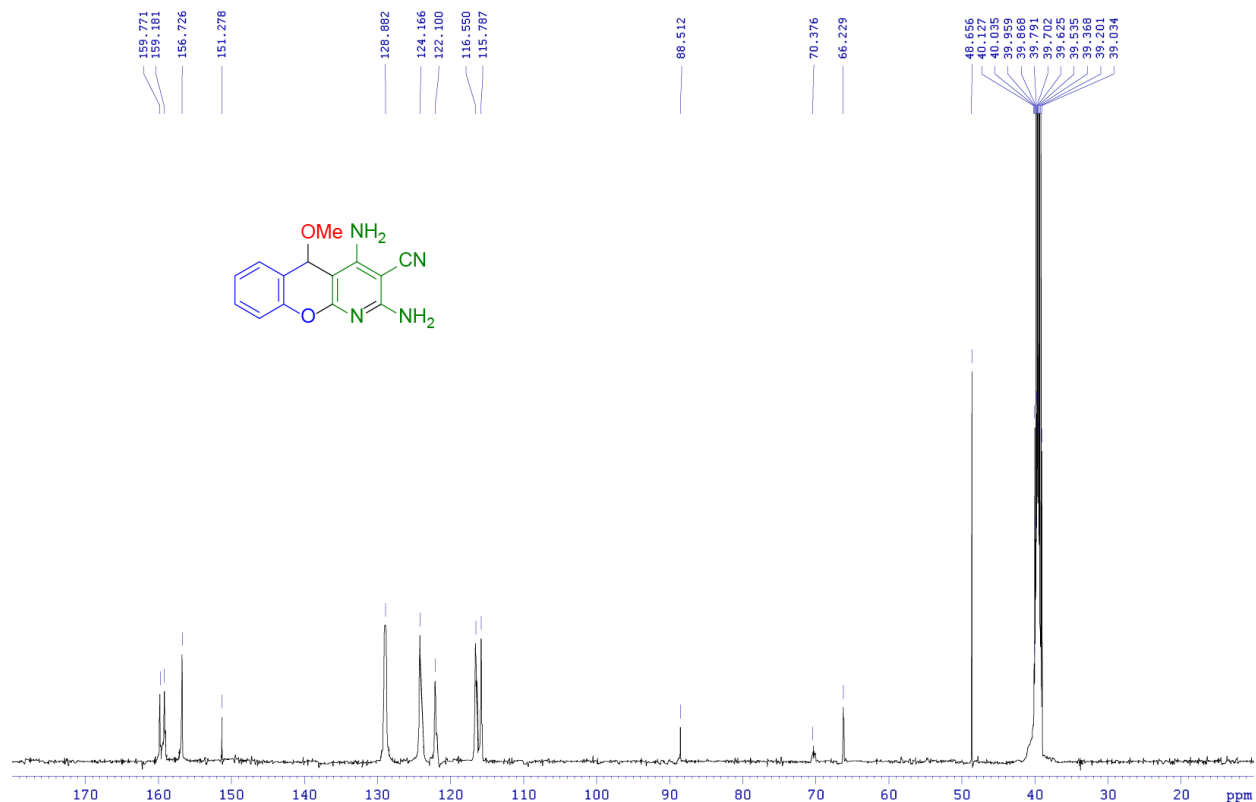

**Figure S3.**  $^1\text{H}$  NMR spectrum of 2,4-diamino-5-ethoxy-5*H*-chromeno[2,3-*b*]pyridine-3-carbonitrile **4b** in  $\text{DMSO-}d_6$ .

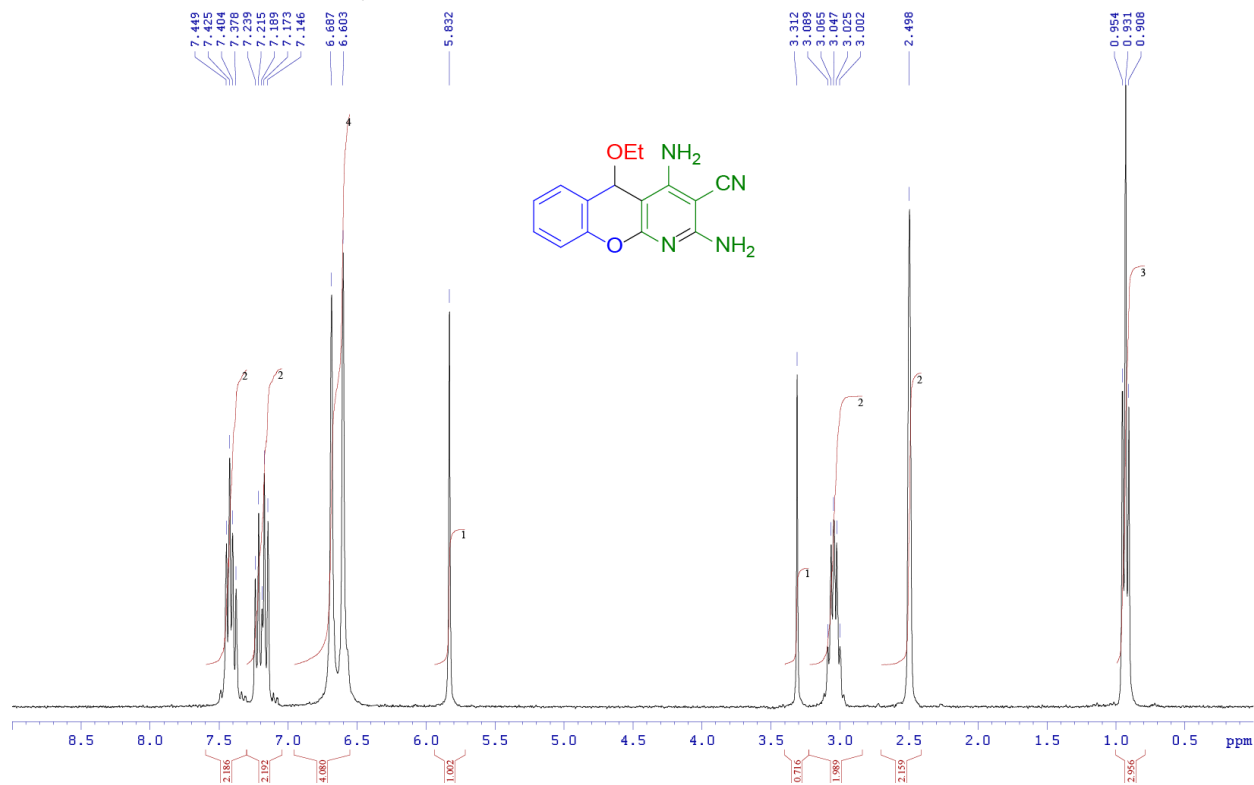

**Figure S4.**  $^{13}\text{C}$  NMR spectrum of 2,4-diamino-5-ethoxy-5*H*-chromeno[2,3-*b*]pyridine-3-carbonitrile **4b** in  $\text{DMSO-}d_6$ .

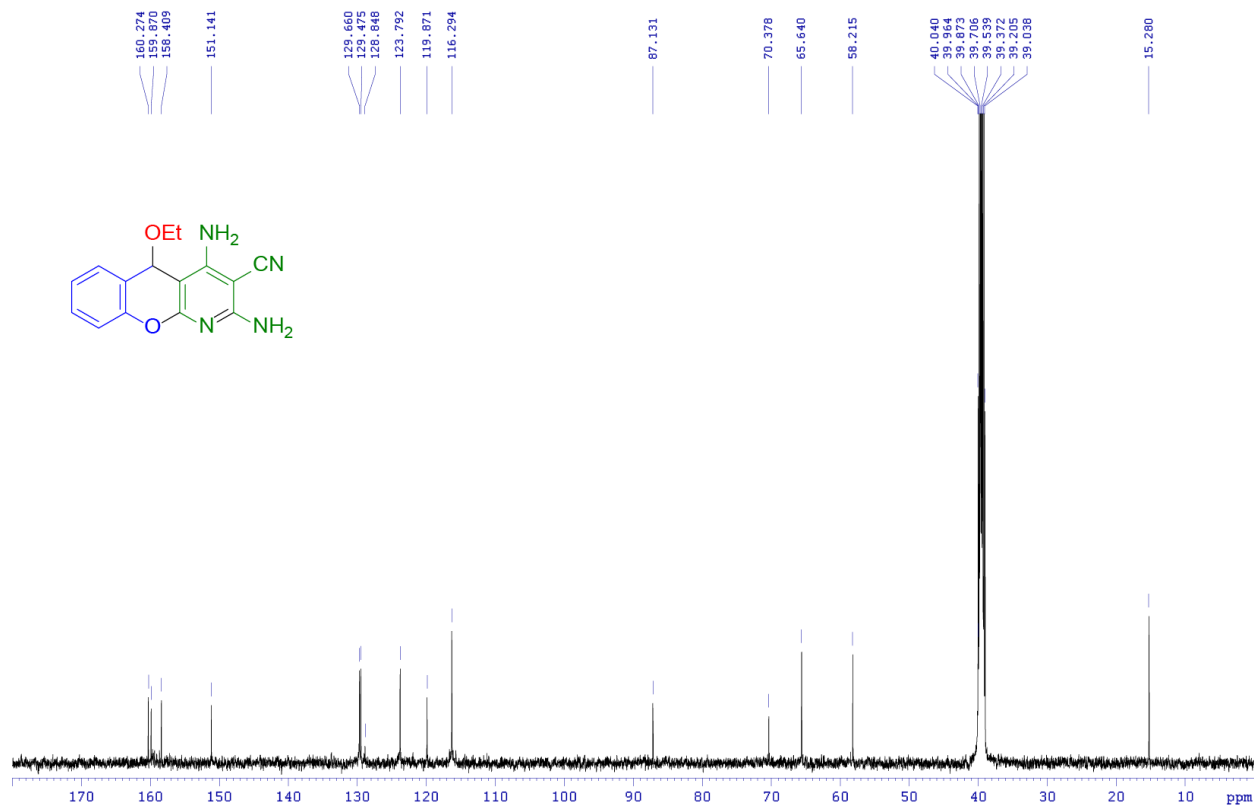

**Figure S5.**  $^1\text{H}$  NMR spectrum of 2,4-diamino-5-propoxy-5*H*-chromeno[2,3-*b*]pyridine-3-carbonitrile **4c** in  $\text{DMSO-}d_6$ .

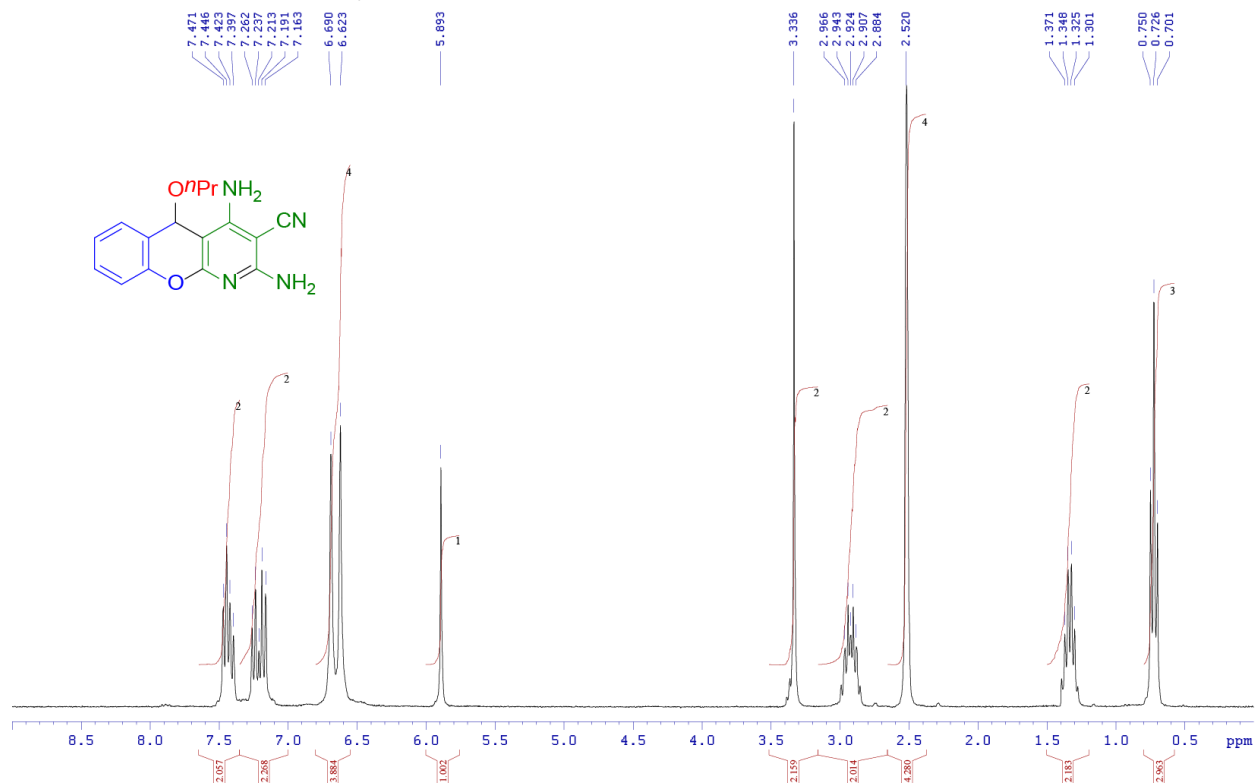

**Figure S6.**  $^{13}\text{C}$  NMR spectrum of 2,4-diamino-5-propoxy-5*H*-chromeno[2,3-*b*]pyridine-3-carbonitrile **4c** in  $\text{DMSO-}d_6$ .

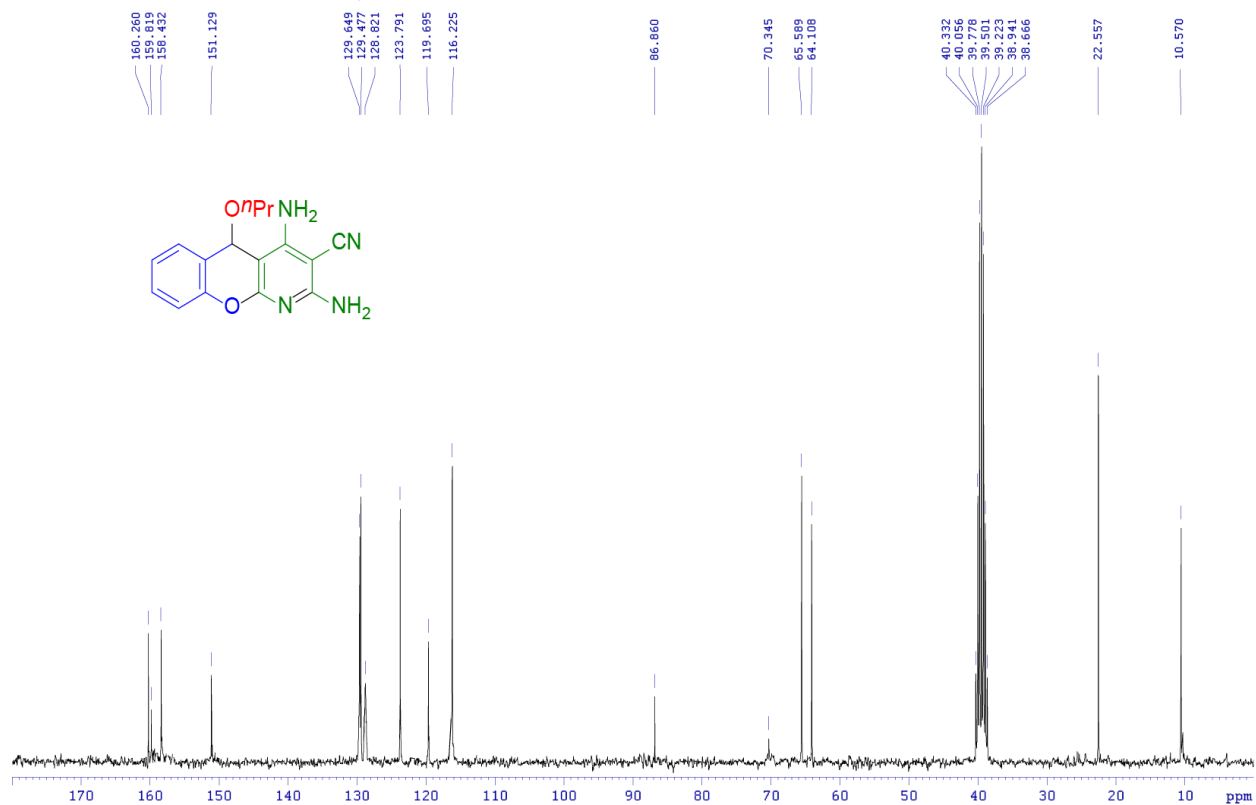

**Figure S7.**  $^1\text{H}$  NMR spectrum of 2,4-diamino-5,8-dimethoxy-5*H*-chromeno[2,3-*b*]pyridine-3-carbonitrile **4d** in  $\text{DMSO-}d_6$ .

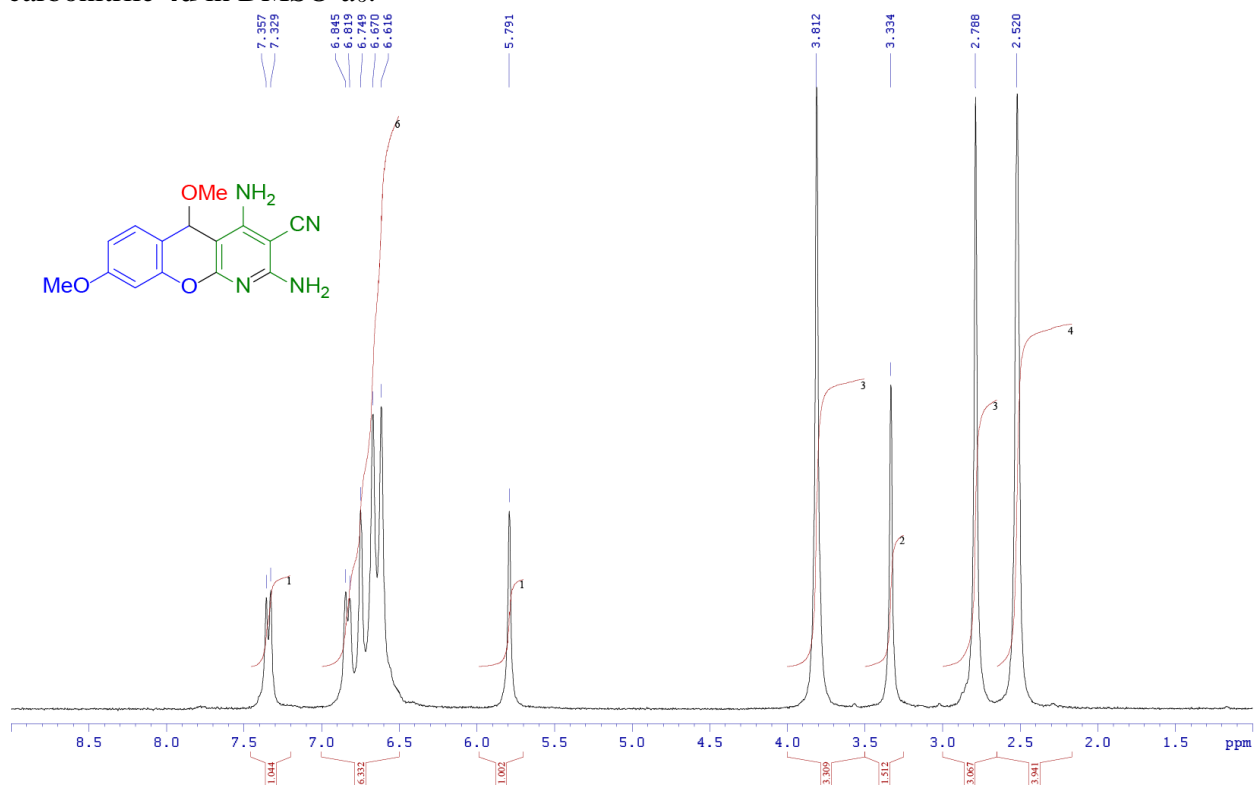

**Figure S8.**  $^{13}\text{C}$  NMR spectrum of 2,4-diamino-5,8-dimethoxy-5*H*-chromeno[2,3-*b*]pyridine-3-carbonitrile **4d** in  $\text{DMSO-}d_6$ .

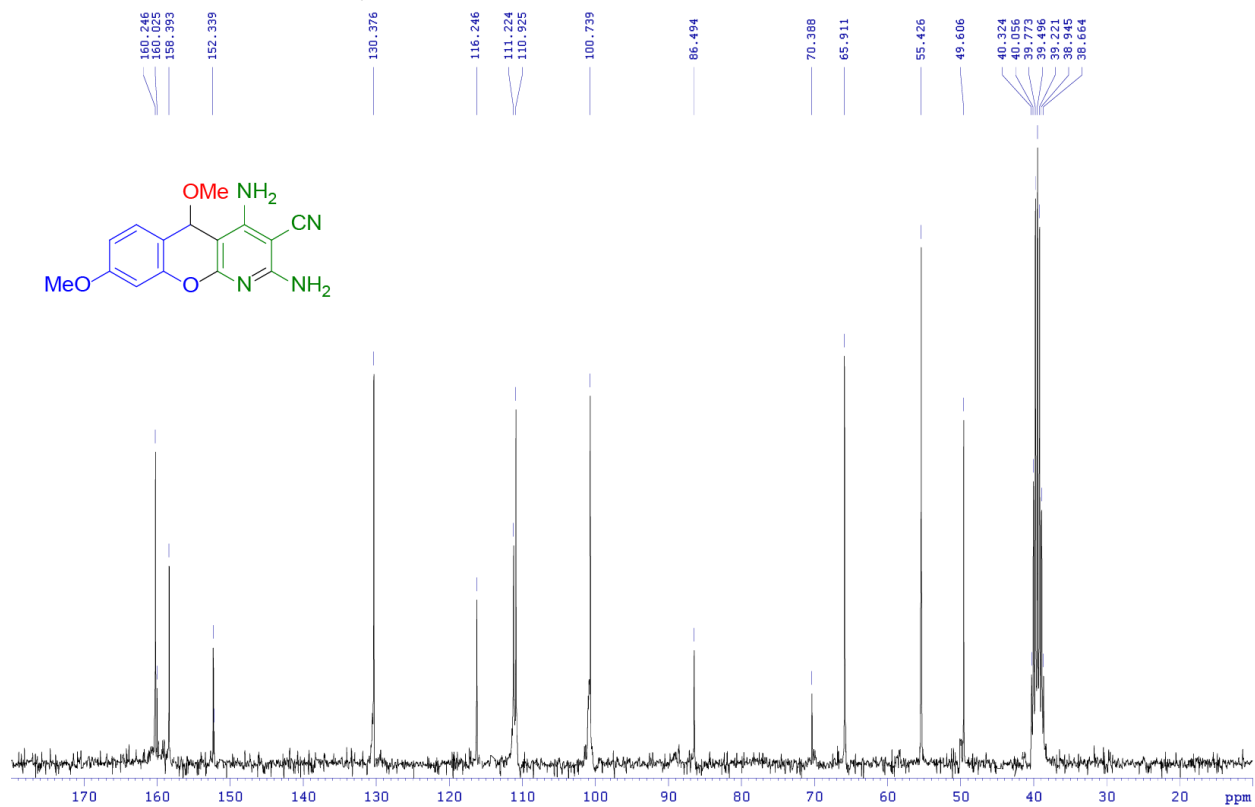

Chemical structure: CCOC1=CC=C2C(=C1)N=CN(C=C2)C#N

<sup>1</sup>H NMR spectrum (CDCl<sub>3</sub>) showing peaks labeled 1, 2, 3, 4, and 6. The x-axis is chemical shift in ppm (0.5 to 8.5). Integration values are shown below the baseline.

| Peak Label | Chemical Shift (ppm) | Integration |
|------------|----------------------|-------------|
| 1          | ~7.4                 | 1.000       |
| 2          | ~3.1                 | 1.999       |
| 3          | ~3.8                 | 2.004       |
| 4          | ~2.5                 | 4.384       |
| 6          | ~6.7                 | 6.170       |

Chemical structure of the compound is shown above the spectrum. The structure is a benzimidazole derivative with a 4-methoxyphenyl group, an ethoxy group, and a 2,6-diaminophenyl group.

COc1ccc2c(c1)oc3c(nc(N)c(N)c3c2)OCC

The spectrum shows peaks corresponding to the chemical structure, with the following chemical shifts (ppm) labeled above the peaks:

- 160.159, 159.622, 158.347, 152.106, 152.007, 130.255, 116.259, 111.982, 110.842, 100.776, 87.209, 70.370, 65.326, 57.714, 55.406, 40.319, 40.053, 39.773, 39.486, 38.218, 38.040, 38.663, 15.264.

The spectrum is a <sup>13</sup>C NMR spectrum, showing peaks in the aromatic region (100-160 ppm) and aliphatic region (15-60 ppm).

**Figure S11.**  $^1\text{H}$  NMR spectrum of 2,4-diamino-8-methoxy-5-propoxy-5*H*-chromeno[2,3-*b*]-pyridine-3-carbonitrile **4f** in  $\text{DMSO-}d_6$ .

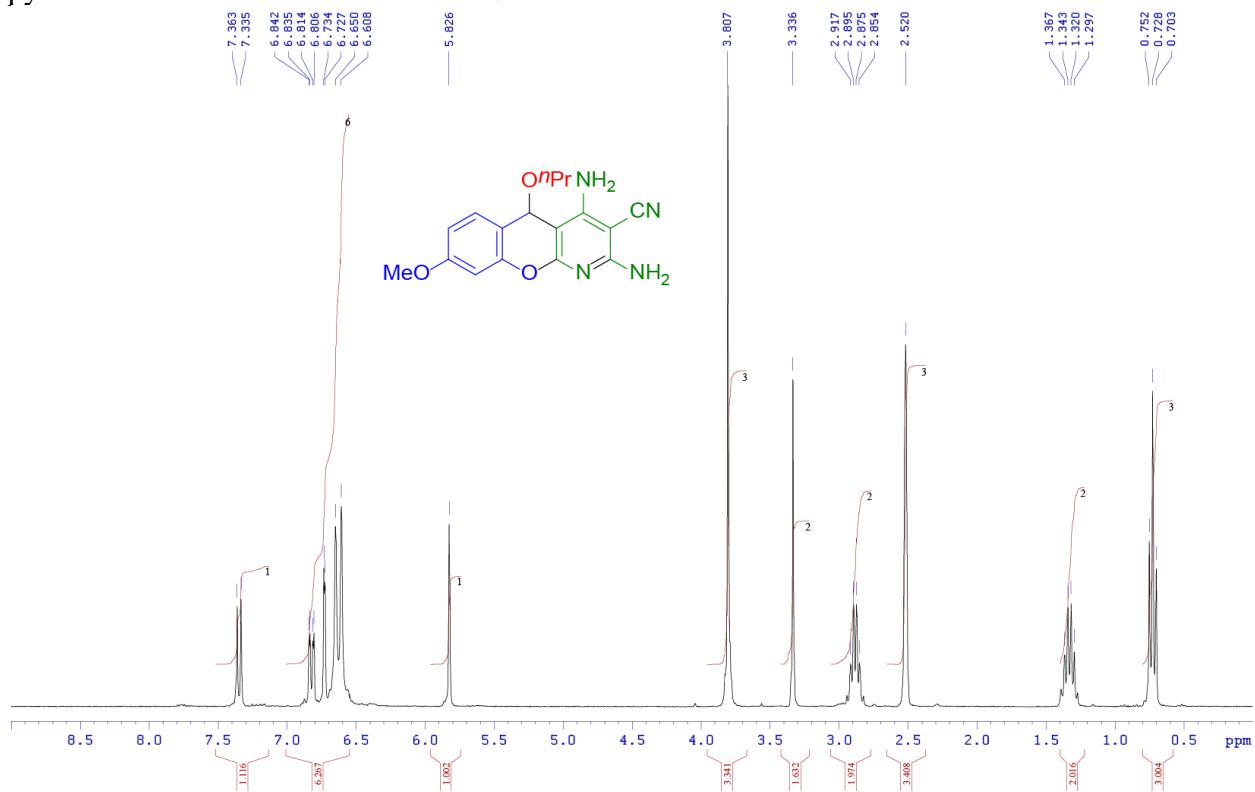

**Figure S12.**  $^{13}\text{C}$  NMR spectrum of 2,4-diamino-8-methoxy-5-propoxy-5*H*-chromeno[2,3-*b*]-pyridine-3-carbonitrile **4f** in  $\text{DMSO-}d_6$ .

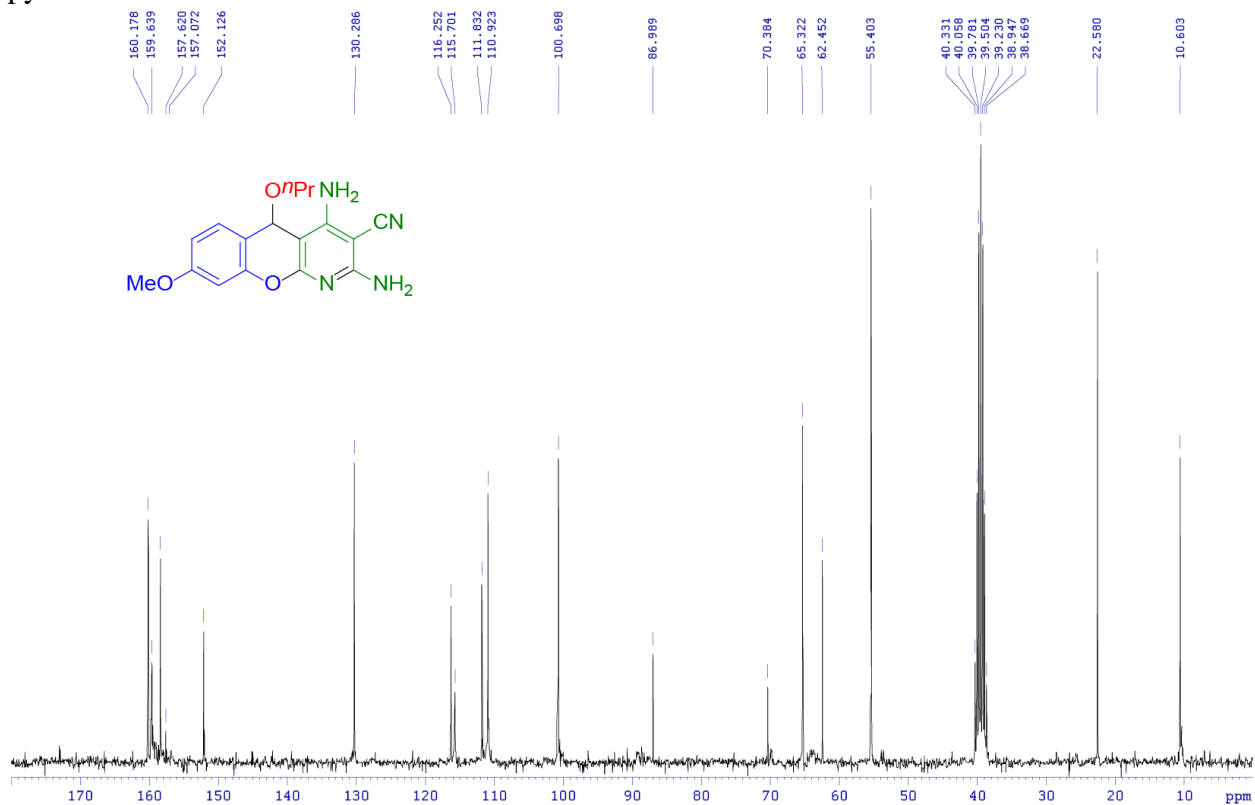

**Figure S13.**  $^1\text{H}$  NMR spectrum of 2,4-diamino-7-chloro-5-methoxy-5*H*-chromeno[2,3-*b*]-pyridine-3-carbonitrile **4g** in  $\text{DMSO-}d_6$ .

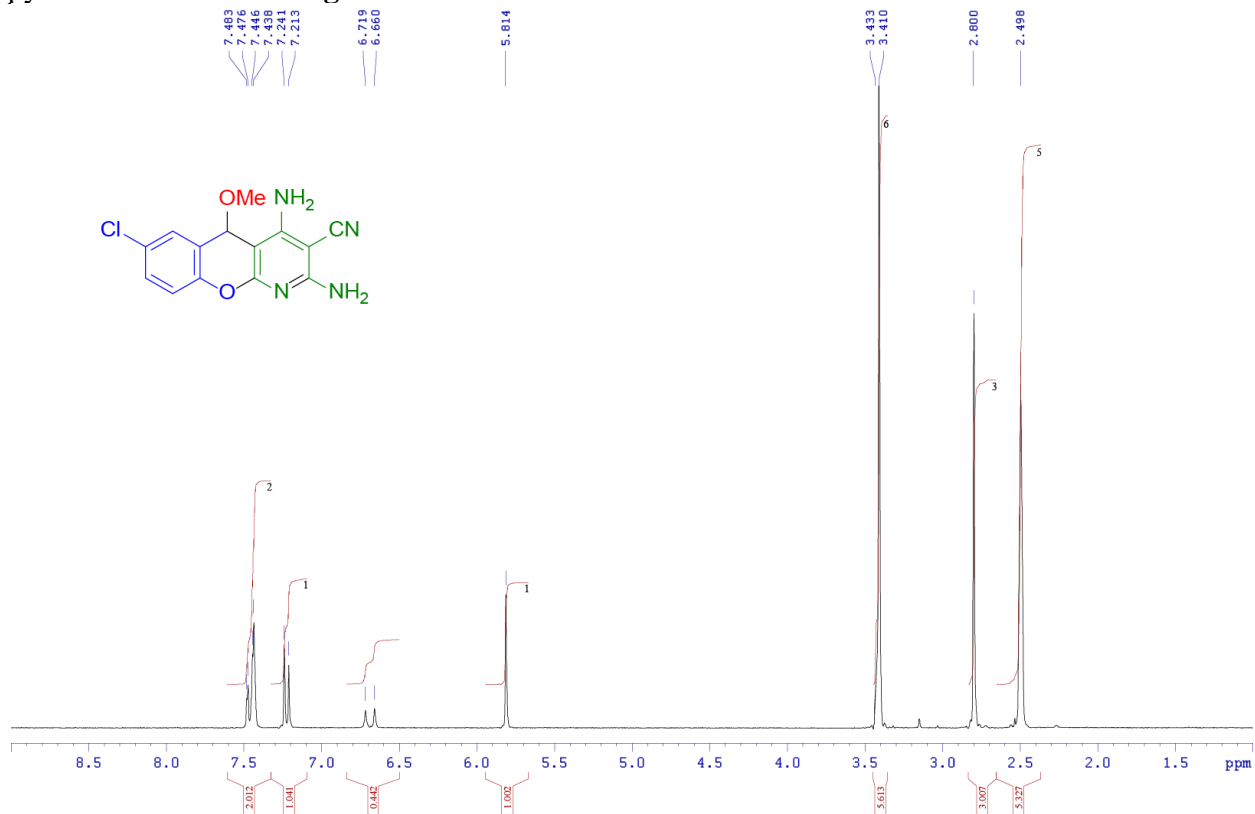

**Figure S14.**  $^{13}\text{C}$  NMR spectrum of 2,4-diamino-7-chloro-5-methoxy-5*H*-chromeno[2,3-*b*]pyridine-3-carbonitrile **4g** in  $\text{DMSO-}d_6$ .

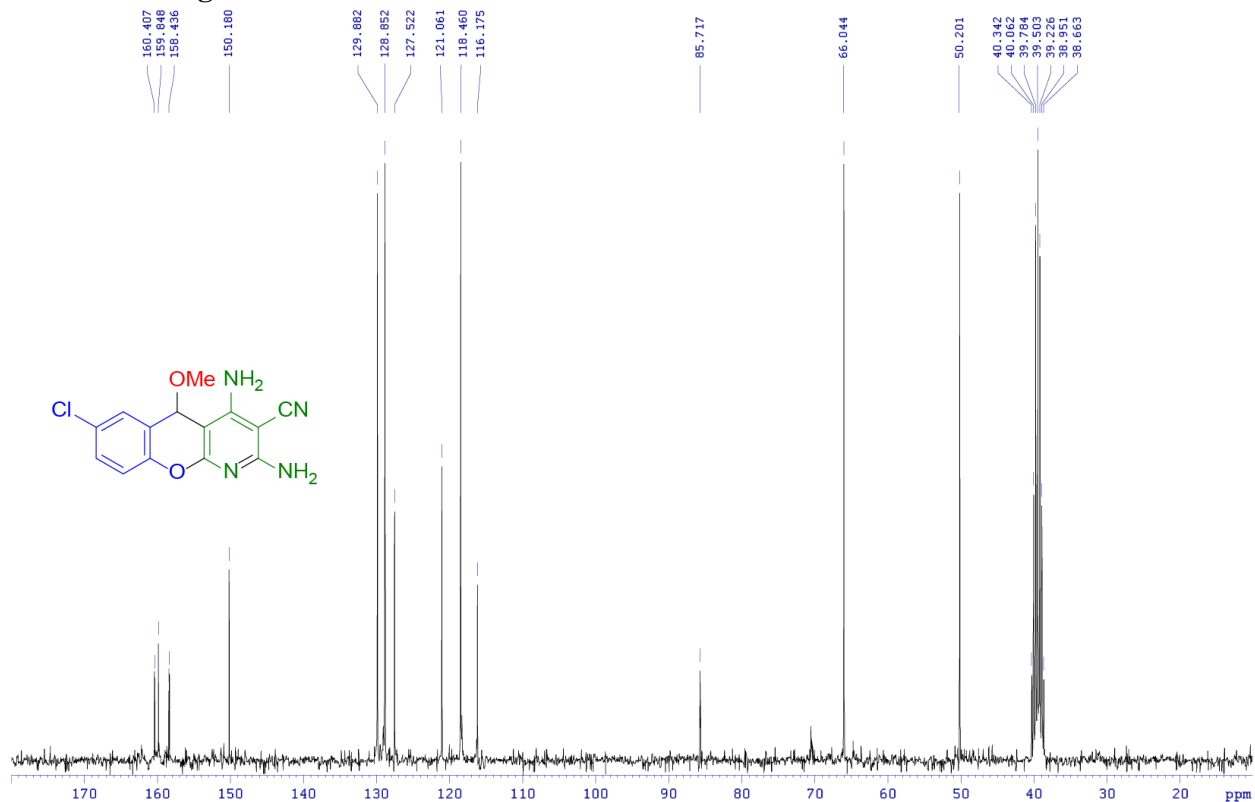



**Figure S15.**  $^1\text{H}$  NMR spectrum of 2,4-diamino-7-chloro-5-ethoxy-5*H*-chromeno[2,3-*b*]pyridine-3-carbonitrile **4h** in  $\text{DMSO}-d_6$ .

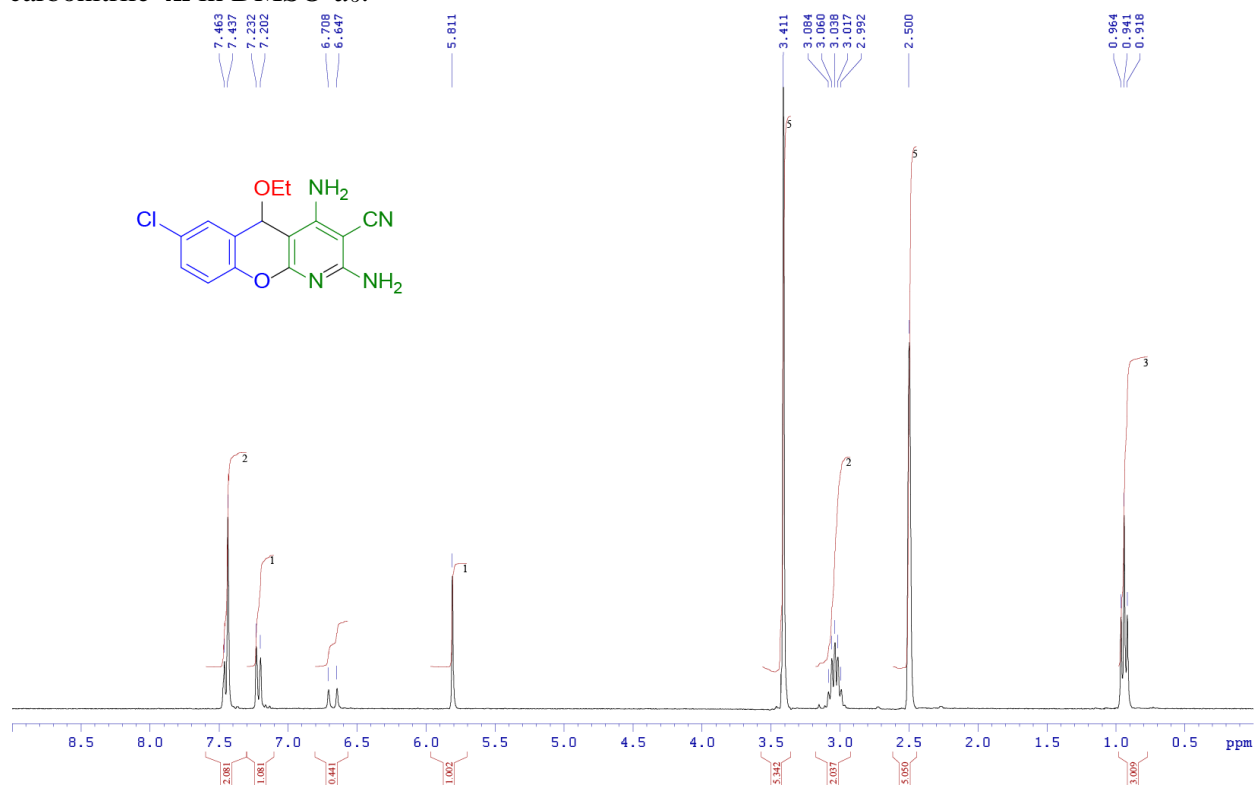

**Figure S16.**  $^{13}\text{C}$  NMR spectrum of 2,4-diamino-7-chloro-5-ethoxy-5*H*-chromeno[2,3-*b*]pyridine-3-carbonitrile **4h** in  $\text{DMSO}-d_6$ .

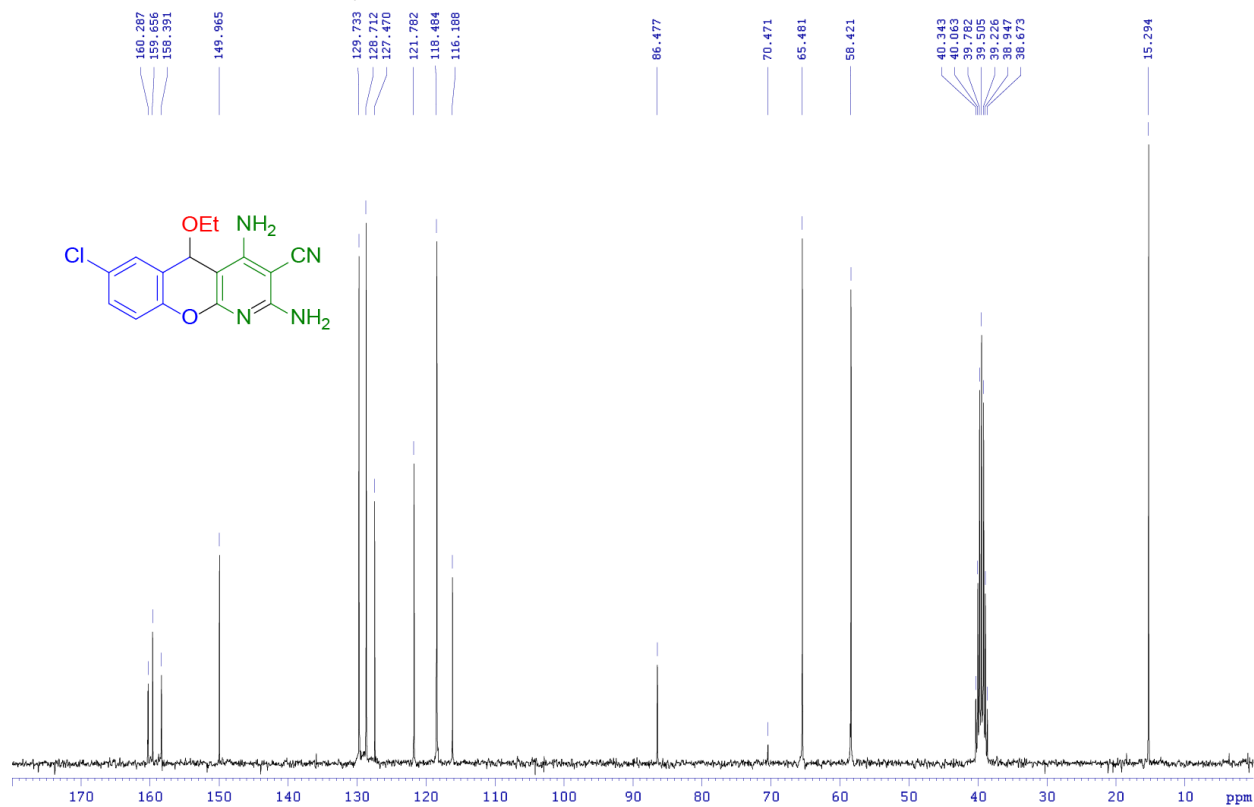

**Figure S17.**  $^1\text{H}$  NMR spectrum of 2,4-diamino-7-chloro-5-ethoxy-5*H*-chromeno[2,3-*b*]pyridine-3-carbonitrile **4i** in  $\text{DMSO-}d_6$ .

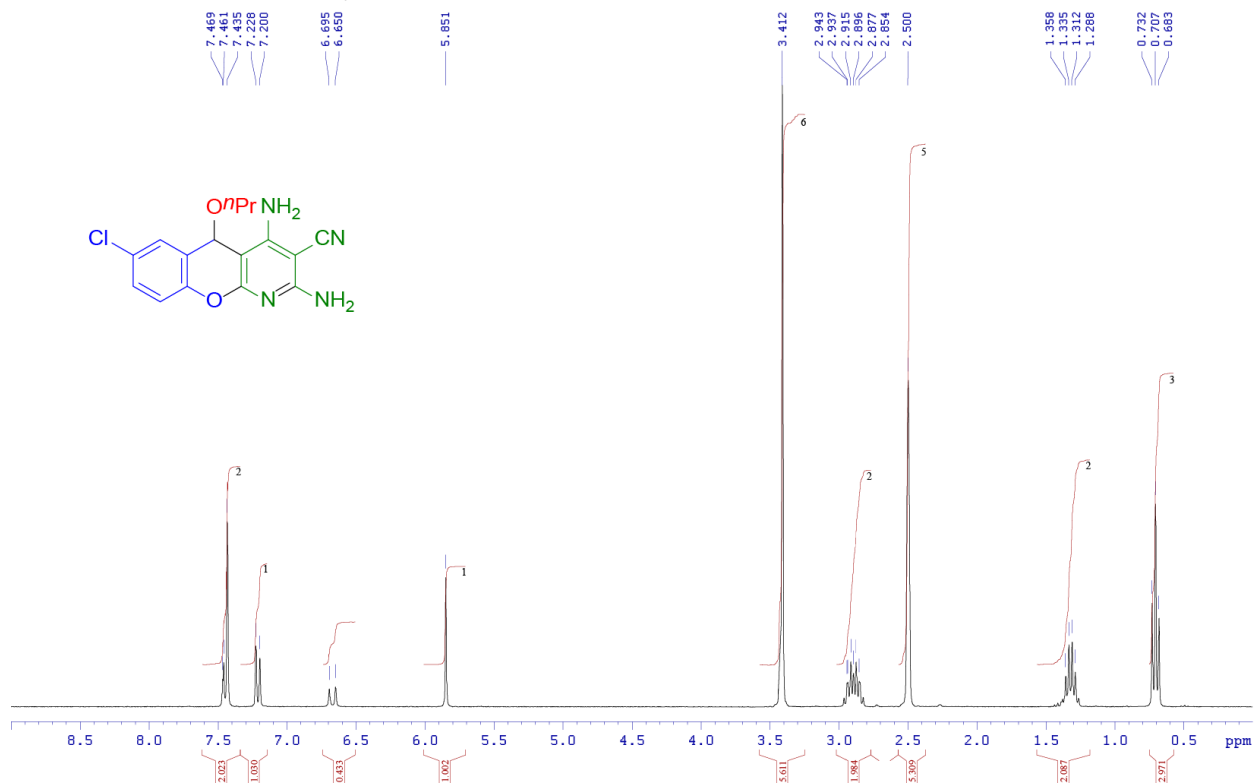

**Figure S18.**  $^{13}\text{C}$  NMR spectrum of 2,4-diamino-7-chloro-5-ethoxy-5*H*-chromeno[2,3-*b*]pyridine-3-carbonitrile **4i** in  $\text{DMSO-}d_6$ .

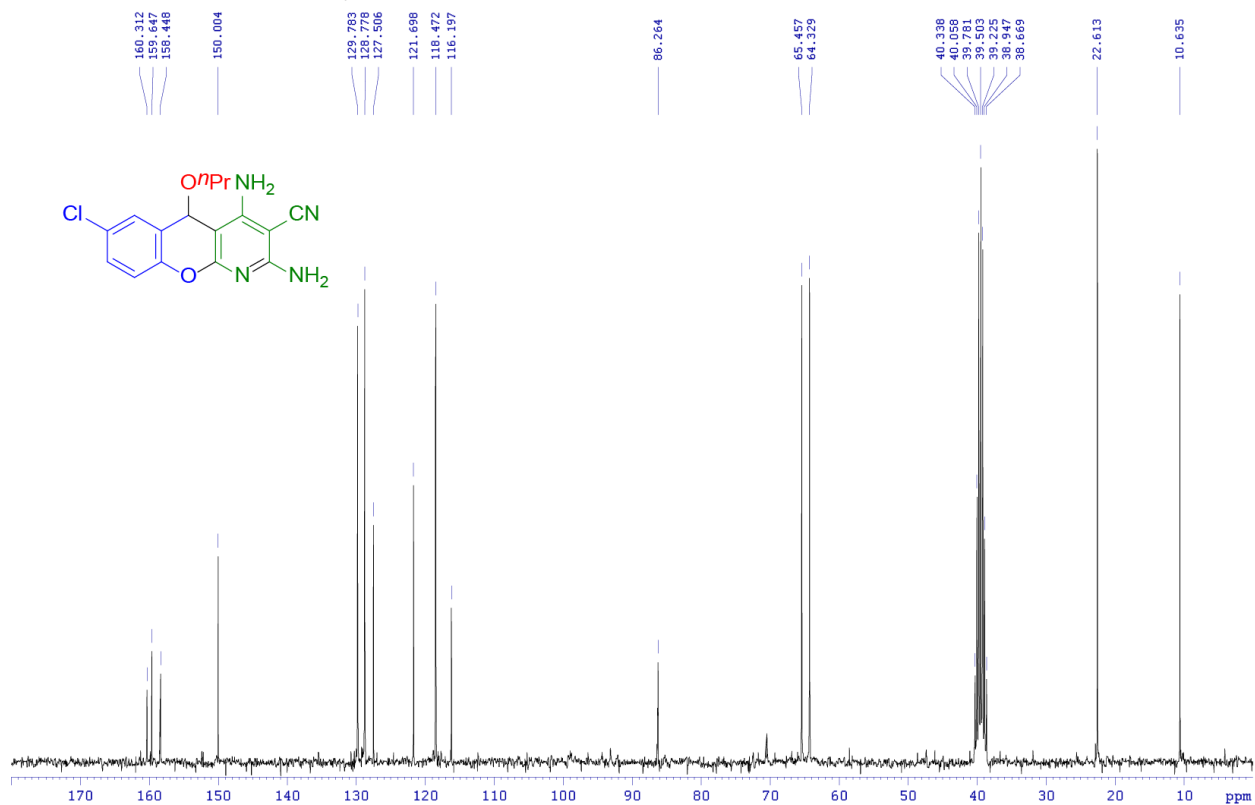

## 2. Detailed 1D $^1\text{H}$ and $^{13}\text{C}$ NMR spectra for compound **4d**

**Figure S19.** Detailed  $^1\text{H}$  NMR spectrum of 2,4-diamino-5,8-dimethoxy-5*H*-chromeno[2,3-*b*]-pyridine-3-carbonitrile **4d** in DMSO- $d_6$  (500 MHz, 298 K).

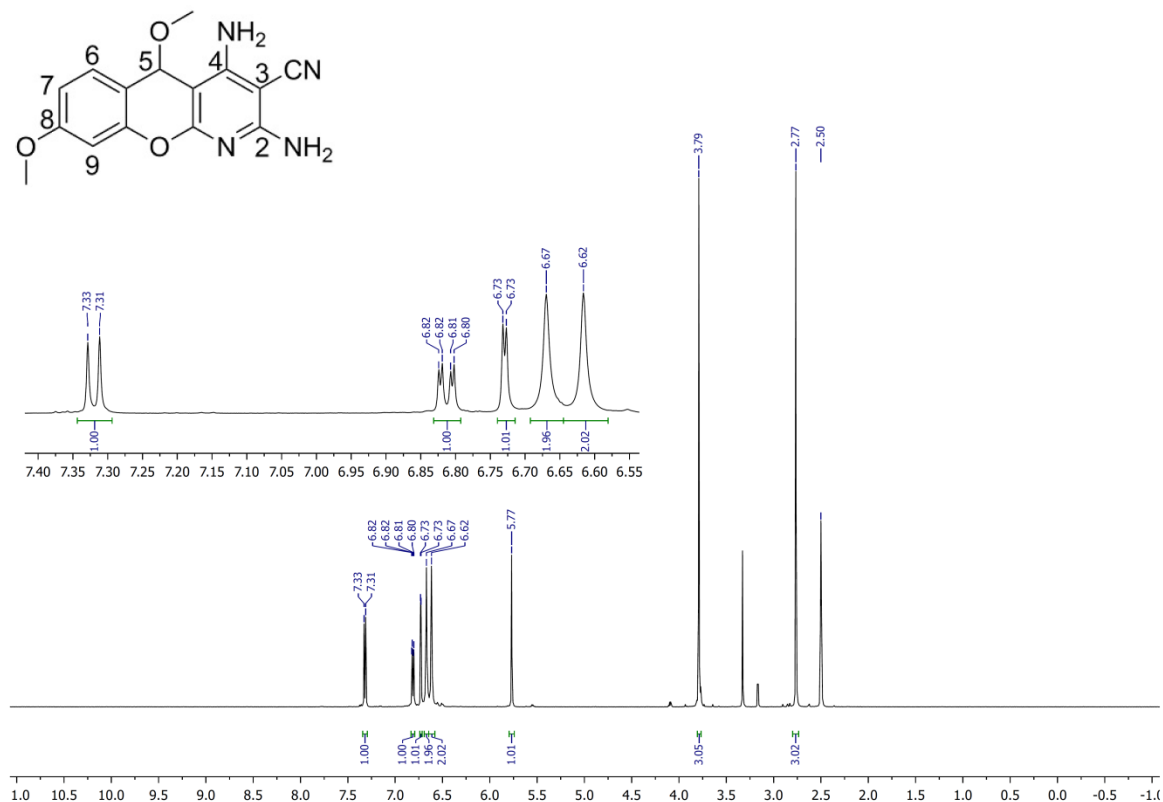

**Figure S20.** Detailed  $^{13}\text{C}$  NMR spectrum of 2,4-diamino-5,8-dimethoxy-5*H*-chromeno[2,3-*b*]-pyridine-3-carbonitrile **4d** in DMSO- $d_6$  (126 MHz, 298 K).

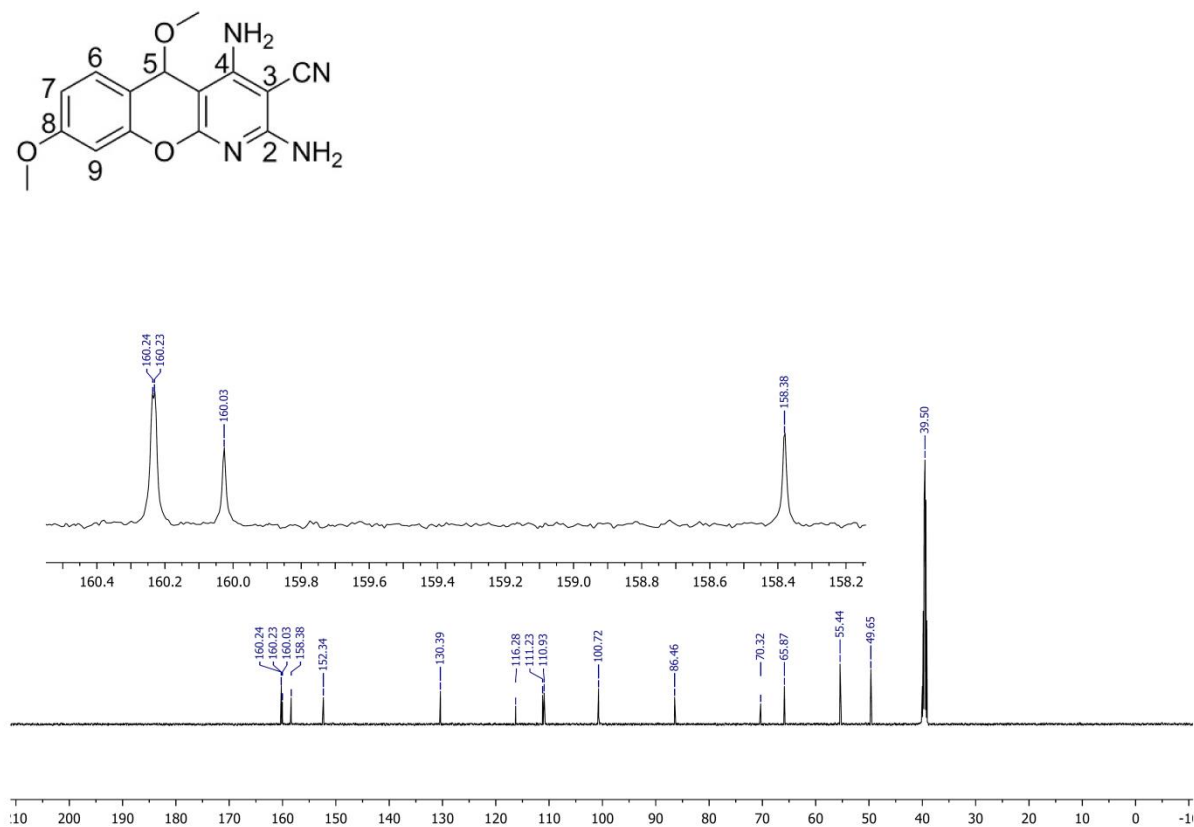

### 3. 2D NMR data for compound **4d**

**Figure S21.**  $^1\text{H}$ - $^{13}\text{C}$  HMBC NMR spectrum of 2,4-diamino-5,8-dimethoxy-5*H*-chromeno[2,3-*b*]pyridine-3-carbonitrile **4d** in DMSO- $d_6$  (400 MHz, 298 K).

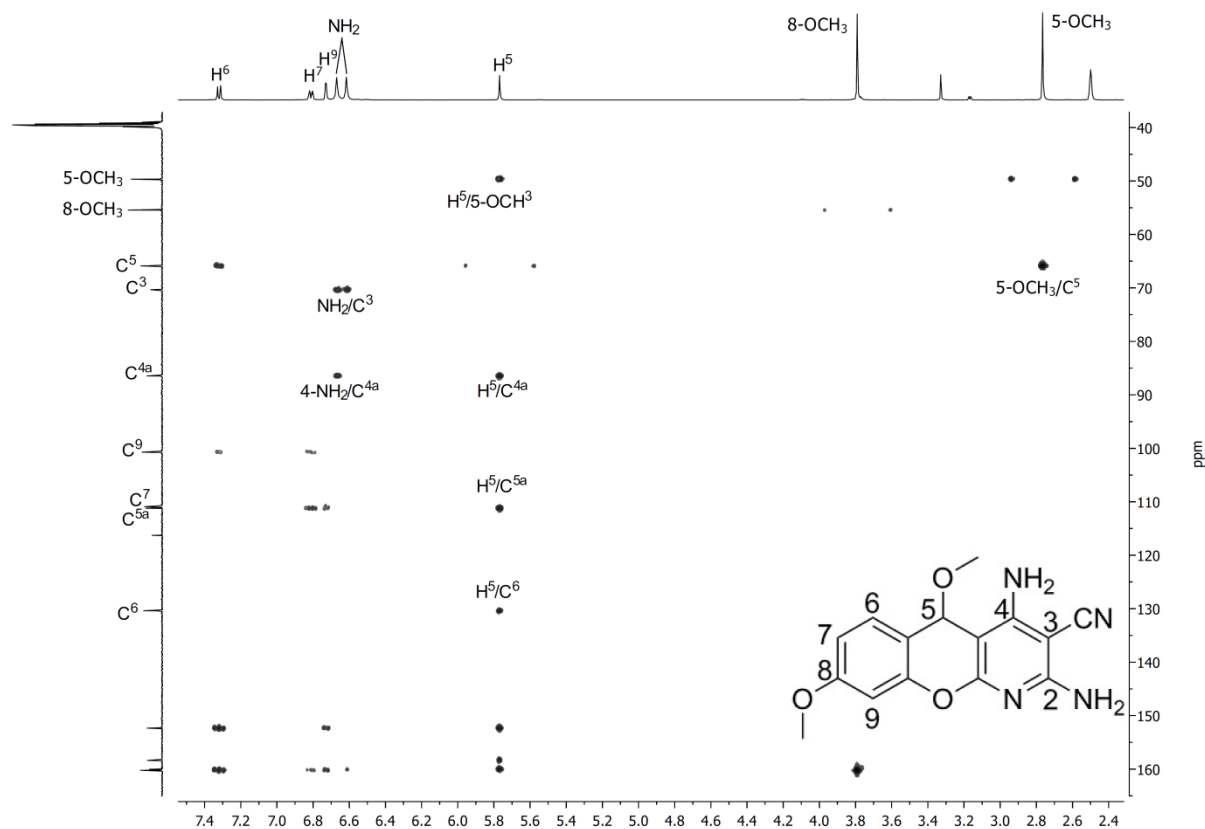

**Figure S22.**  $^1\text{H}$ - $^{13}\text{C}$  HSQC NMR spectrum of 2,4-diamino-5,8-dimethoxy-5*H*-chromeno[2,3-*b*]pyridine-3-carbonitrile **4d** in DMSO- $d_6$  (400 MHz, 298 K).

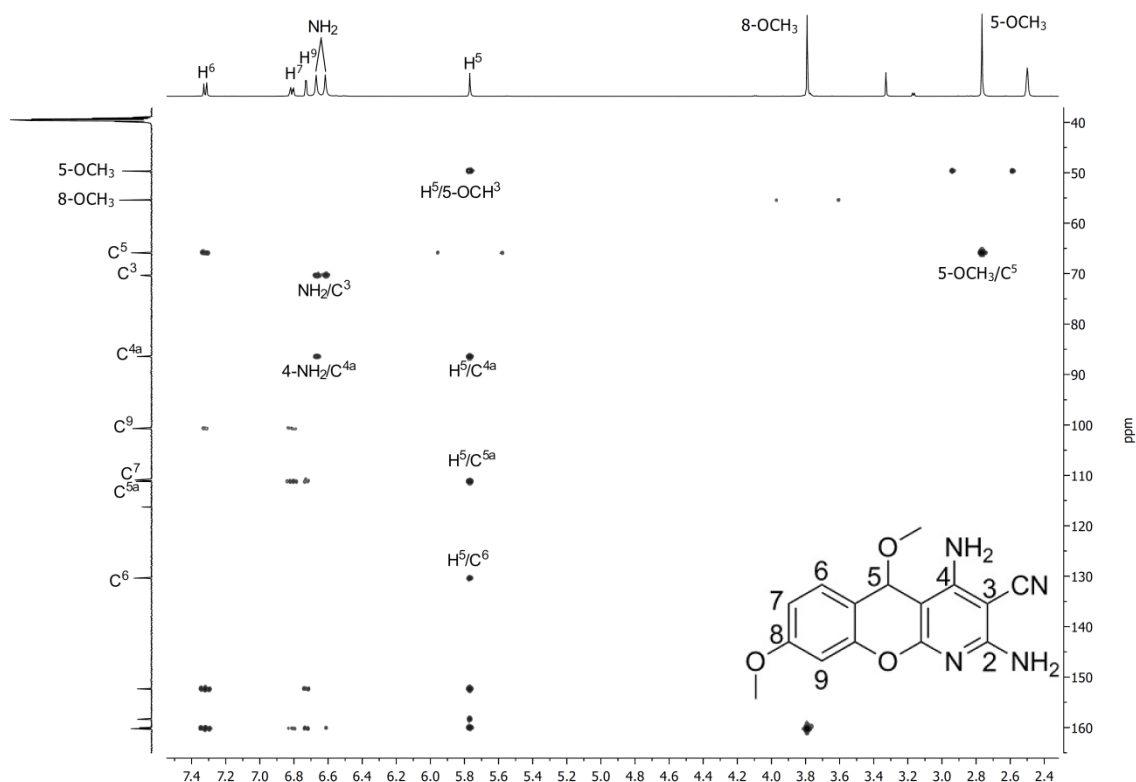

Supplement: s1 [file s1]
